1 **TITLE & AUTHORS' PAGE**

2 **Title:**

3 **EXPLORING THE PHYSICAL WELL-BEING OF BREAST CANCER PATIENTS IN**  
4 **KUMASI METROPOLIS: A QUALITATIVE STUDY.**

5 **Authors:**

6 Victoria Sefah, <sup>1</sup>\*([victoriasefah2g4@gmail.com](mailto:victoriasefah2g4@gmail.com))

7 Hayford Isaac Budu<sup>3</sup> ([buduhayford@yahoo.com](mailto:buduhayford@yahoo.com))

8 Priscilla Felicia Tano<sup>2</sup> ([pftano@gmail.com](mailto:pftano@gmail.com))

9 Emmanuel Kofi Lawer<sup>4</sup> ([elawer@aims.edu.gh](mailto:elawer@aims.edu.gh))

10 Dr. Emile Kouakou Tano<sup>5</sup> ([kanot2001@yahoo.com](mailto:kanot2001@yahoo.com))

11 <sup>1</sup> Department of Nursing, Wisconsin International University College, Kumasi, Ghana.

12 <sup>2</sup> Department of Nursing, Garden City University College, Kumasi – Ghana.

13 <sup>3</sup> Faculty of Allied Health, Department of Nursing, Kwame Nkrumah University of Science and  
14 Technology, Kumasi, Ghana.

15 <sup>4</sup> Department of Mathematics, Ghana Education Service, Serwaah Nyarko Girls' Senior High  
16 School, Kumasi, Ghana.

17 <sup>5</sup> Surgery Directorate, Komfo Anokye Teaching Hospital, Kumasi, Ghana.

18

19

20 \*Correspondence:

21 Victoria Sefah

22 [Victoriasefah2g4@gmail.com](mailto:Victoriasefah2g4@gmail.com)

23

24

25

26

27

28

29

30

31

32

33

34

## 35 Abstract

36 **Background:** Years back, cancer was thought to be a problem limited to the developed countries.  
37 Cancer is now a disease with lots of burden, leading cause of death and disability in developing  
38 countries. Physical health is very important for the overall well-being of breast cancer survivors,  
39 since it is the visible part of the dimensions of overall health and well-being. Prior studies have  
40 examined factors leading to late detection, financial burden and experiences of caregivers of breast  
41 cancer patients in Ghana, however, none of the studies have explored how breast cancer may  
42 specifically impact the physical well-being and the quality of life of these women. This study  
43 therefore seeks to explore how breast cancer impact the physical well-being and the quality of life  
44 of these women.

45 **Methodology:** The study site and setting was the Oncology directorate at Komfo Anokye  
46 Teaching Hospital where twelve respondents were recruited for the study. Breast care survivors  
47 were purposively sampled and interviewed (face- to- face) to explore how the BC has impacted on  
48 their physical wellbeing and their Quality of Life (QoL). Demographic data were obtained before  
49 the main interview. The interviews lasted between 30minutes to 45minutes. Data was analysed  
50 using thematic analysis of key information by using NVivo data management software.

51 **Results:** Participants described their physical wellbeing according to the way they encountered  
52 the disease from the onset through to the treatment administration. Five sub-themes emerged,  
53 namely: Fatigue/bodily weakness: impaired functional ability: pain; distorted sleep; and fertility.

54 **Conclusion:** Fatigue, impaired functional ability, pain, distorted sleep and fertility were consistent  
55 with constructs of the Quality of Life model. These physical symptoms negatively affected the  
56 total well-being of the BCSs.

57 **Key words: Breast cancer survivors, chemotherapy, radiotherapy, quality of life,**  
58 **mastectomy, Physical Well-being, Pain, Distorted Sleep, Fertility, Fatigue.**

59

60

61

62

63

64

65

66

67

68

69

70

71

72

73

74

## 75 Introduction

76 Years back, cancer was thought to be a problem limited to the developed countries. Cancer is now  
77 a disease with lots of burden, leading cause of death and disability in developing countries. Among  
78 cancers, breast cancer currently is one of the well-known malignancies with high mortality all over  
79 the world affecting women in both developed and developing countries [1].

80 The International Agency for Cancer Research (IARC) in 2018 posited that breast cancer is the  
81 fifth leading cause of death with a record of 627,000 representing 6.6% of the world cancer deaths.  
82 Over the years, the incidence of breast cancer has increased enormously with 7.5% in 1975, 12.8%  
83 in 1996 and a staggering 12.8% in 2009 for all cancer cases [2, 3].

84 In Ghana, breast cancer is a major public health problem and the lead mortality rate in cancer cases  
85 although it is the fourth cause of death in cancer cases worldwide [4]. Ghana like other Sub-  
86 Saharan countries experiences late report of breast cancer symptoms, lack of access to radiotherapy  
87 facility, high economic burden and discontinuing follow-up treatment [5].

88 The treatment of breast cancer largely depends on the stage of diagnosis. The American Cancer  
89 Society categorized stages of breast cancer (from stage 0, stage I, stage II, stage III and stage IV)  
90 according to the extent to which the cancer cells have evaded the breast. Treatment options include  
91 one or a combination of surgery, radiation therapy, chemotherapy, and endocrine or hormone  
92 therapy. However, undergoing any of the cancer treatment comes with its side effects that affect  
93 the physical, social, psychological and spiritual well-beings of the individual [6].

94 Physical well-being is “the ability to perform physical activities and carry out social roles that are  
95 not hindered by physical limitations and experiences of bodily pain, and biological health

96 indicators”. Physical health is very important for the overall well-being of breast cancer survivors,  
97 since it is the visible part of the dimensions of overall health and well-being [7].

98 Generally, women with breast cancer may experience some changes in their body because of the  
99 signs and symptoms of the disease and treatment regime which is very devastating. These visible  
100 changes are concealed by the survivors in ways such as wearing of under clothes and wigs [8].

101 Fatigue is significant and one of the long-term problems that is inevitable to cancer patients and  
102 survivors [9]. Breast cancer survivors in advance stage of the disease experience fatigue as the  
103 most troubling symptom, increased fatigue is associated with decreased patients’ functional status  
104 and QoL [10]. A study on cancer related fatigue posited that, breast cancer related fatigue goes a  
105 long way to interfere with the therapy and hence prolong the duration of the treatment [11].

106 Sleep quality of breast cancer survivors may be distorted as they go through different treatment  
107 procedures. A number of studies on QoL of cancer survivors indicated that distortions of sleep of  
108 cancer survivors is a key symptom of the disease and its treatment [12]. Among all cancer  
109 survivors, breast cancer survivors have the highest prevalence sleep disturbance and subjective  
110 complaints which indicate that breast cancer survivors have poorer sleep quality compared to the  
111 other cancer survivors. Sleep disturbances among breast cancer survivors may be attributable to  
112 varied interacting factors such as pain, fatigue, adverse effects of treatment such as nausea,  
113 vomiting, and psychological causes [13].

114 Fertility plays a significant role in the quality of life of breast cancer survivors, mainly for those  
115 of reproductive age [14, 15]. Breast cancer survival rate continue to increase as a result of the  
116 emergence and enhanced technological and medical treatment for breast cancer and an increased  
117 public education on breast cancer. As the survival rate rises, so does the importance of starting or  
118 expanding the family during and after cancer [16]. Due to the side effects of breast cancer treatment

119 and the trauma associated with the disease, getting pregnant sometimes becomes difficult  
120 naturally.

121 Breast cancer survivors can experience pain when the developing tumour press on the nerves or  
122 bone or other organs around the breast. Pain from breast cancer can be mild to severe depending  
123 on the survivor and extent of the cancer. According to the ACS, peripheral neuropathy, mouth  
124 sores and radiation mucositis are common pain experienced by breast cancer survivors during and  
125 after chemotherapy and radiation therapy respectively [6]. Breast cancer survivors who had  
126 undergone mastectomy might experience chronic, progressively debilitating neuropathic pain in  
127 the arm axilla, chest wall and breast [17]. This pain makes it difficult for the patients to perform  
128 their routine daily activities which negatively affects their quality of life.

129  
130 Prior studies have examined factors leading to late detection, financial burden and experiences of  
131 caregivers of breast cancer patients in Ghana, however, none of the studies have explored how  
132 breast cancer may specifically impact the physical well-being and the quality of life of these  
133 women. This study therefore seeks to explore how breast cancer impact the physical well-being  
134 and the quality of life of these women.

135

## 136 Methodology

137

138 The study site and setting was the Oncology directorate at Komfo Anokye Teaching Hospital  
139 (KATH). The study population included every breast cancer survivor for 6 months and more after  
140 being diagnosed of breast cancer, who is eighteen (18) years or more than eighteen years up to 65  
141 years, and who had sought for clinical or non-clinical service(s) at the oncology directorate at  
142 KATH as at the time of the study. However, breast cancer survivors who are too sick to

143 communicate and those who are not mentally sound were excluded from the study. Certificate of  
144 Registration (RD/CR20/049) was obtained from the Research Unit of the Komfo Anokye Teaching  
145 Hospital. In addition, ethical clearances were obtained from Kwame Nkrumah University of  
146 Science and Technology Committee on Human Rights Publication and Ethics (CHRPE) with ref  
147 no: CHRPE/AP/177/20. The research data was collected from 1st October, 2020 to 31st January,  
148 2021, which falls within the approval period stated in the certificate of registration by the Oncology  
149 Unit. This is because no new information was gathered during the interview sessions after the  
150 twelveth (12<sup>th</sup>) participant.

151 After the researcher had obtained the required ethical approvals for this study, BCSs were  
152 approached for data collection. The researcher with the help of a senior nursing officer and a staff  
153 nurse at the Oncology directorate recruited the respondents who were willing to share their  
154 experiences about the BC and its impartation on their physical wellbeing after considering the  
155 study's inclusion and exclusion criteria [18]. The researcher explained the reason for conducting  
156 the study to the identified BCSs. An appointment was booked with each participant for an  
157 interview at their convenience. A consent form was given to each participant to read and sign  
158 before they were interviewed. Respondents for the study were not forced to participate but  
159 voluntarily accepted to take part in the study.

160 The qualitative data collection technique used in collecting data for this study were a semi-  
161 structured and unstructured interview. In addition, face-to-face approach was used to administer  
162 the data instruments which helped to obtain accurate screening of respondents. The participants  
163 recruited for this study were given a consent form to read and sign. The Principal Investigator (PI)  
164 informed the participants of their reserved right to withdraw from the study at any point in time  
165 they wished to do so. Demographic data were also obtained before the main interview.



166 The interviews lasted between 30minutes to 45minutes. The interviews were audio recorded with  
167 an electronic audio recorder after participants consented to it. Field notes were taken in order not  
168 to forget the posture, tone, gestures and signs of each participant. In analysing the data for this  
169 study, the researcher transcribed audio-recorded interviews verbatim as a word-processed text.  
170 Data was transcribed with each interview recording saved as a separate word-processed file with  
171 a codified pseudonym in order to maintain confidentiality and preserve anonymity of the  
172 participants. The transcribed data was analysed using thematic analysis of key information by  
173 using NVivo data management software.

174

## 175 Results

176 In all, 12 women living with breast cancer were recruited for this study. Their ages range from 30  
177 years to 62 years. All participants had some form of education, where two of them had primary  
178 education, six of the participants completed their secondary education and the remaining four had  
179 tertiary education. Seven of the participants were married, one was divorced before diagnosis, one  
180 was widowed, two were unmarried and one has been separated from the husband after her  
181 diagnosis. One of the participants became unemployed after the diagnosis, one was a student, and  
182 two of them were on retirement. The diagnosis of the disease and side effects of its treatment  
183 forced one of the two pensioners to go on voluntary retirement. The remaining eight of the  
184 participants were gainfully employed. Their occupation included trading, banking, accounts clerk,  
185 nursing and teaching. All the participants were Christians with the exception of two participants  
186 who were Muslims.

187 In addition, all the twelve participants had undergone some form of cancer treatment. Eleven of  
188 the participants were receiving chemotherapy and a participant was on injection Faslodex.

189 Among the participants who were receiving chemotherapy, three had undergone surgery  
190 (mastectomy). Only one of the participants had received chemo therapy, surgery and radio therapy.  
191 The participants have been living with the disease for 8 months to 5 years. Again, all the twelve  
192 participants had children: two had a child; three had 2 children; two had 3 children; four had 4  
193 children; and one had 5 children.

194

## 195 Physical Well-being

196 Participants described their physical wellbeing according to the way they encountered the disease  
197 from the onset through to the treatment administration. Five sub-themes emerged, namely:  
198 Fatigue/bodily weakness: impaired functional ability: pain; distorted sleep; and fertility.

199

## 200 Fatigue/Bodily Weakness

201 Fatigue is major symptom of breast cancer and one of the components of the physical well-being  
202 of the QoL model. Most of the participant disclosed that they experienced fatigue/bodily weakness  
203 at a point in the trajectory of the disease. Two of the participants narrated that, they felt tired and  
204 general body weakness that led them to report to the hospital for the detection of breast cancer.

205 *“I was in my usual state of health until about 7 months ago when I started feeling*  
206 *generalized body weakness, I came to the poly clinic, narrated what brought me there and*  
207 *was referred to the BCC after which some laboratory investigations and mammogram were*  
208 *done and I was later referred to the oncology directorate.” (Cynfo)*

209 *“I used to walk about 2 kilometres to the road side every morning to board ‘trotro’ or taxi*  
210 *to the workplace. But now, I have to get 4 or 6 rests in between the same distance before I*  
211 *reach the roadside. I easily get tired when I do little work.” (Marzu)*

212 Some of the women complained of generalized body weakness after receiving the chemo therapy.  
213 They usually spend about 7 days to 14 days to recover from the body weakness.

214 *“My major concern is the general body weakness after receiving the chemo therapy.  
215 Usually, I spent 2 weeks in recovery.” (Geortim)*

216 *“... after I started with the therapy, I became very weak... It takes some weeks to recover.  
217 The interval between the cycles is 3 weeks and by the time you recover then you are due  
218 for the next cycle.” (Beakwa)*

219

## 220 Impaired Functional Ability

221 The women claimed that, their physical activities have been affected negatively. They could not  
222 go to work due to fatigue, body weakness, pain and other side effects from cancer treatment. Even  
223 after recovery from the above-mentioned side effects of cancer treatment, they are unable to  
224 perform duties like they used to do before they were diagnosed. They lamented;

225 *“Yes, it has really affected my work because when I started the chemo, I have not been  
226 able to go to work. After the chemotherapy, I cannot do anything on my own especially in  
227 the first week after receiving the chemo. I cannot cook, sweep or walk for a distance or  
228 even take care of my children.” (Flochi)*

229 *“Initially before I started the therapy, I use to go to work but now I have not been able to  
230 go to work. So far, I have received six cycles of chemotherapy but it was after the fourth  
231 chemotherapy in which a surgery was performed hence, I have not been able to go to  
232 work.” (Monbe)*

233           *“Yes, I felt very weak so I decided not to go to work after the fourth chemo besides I have*  
234           *had a mastectomy done about a month ago hence I am here again for the next cycle of*  
235           *treatment.” (Maryeng)*

236 The functional ability of BCS was affected because their work rate had been reduced. One  
237 participant reported that she had reduced her workload to the minimal and exercise a little after  
238 she was diagnosed of the disease.

239           *“I can only perform little daily activities; I spend most of my time in the hospital and at*  
240           *home but I walk every day from my house to the roadside and back to the house.” (Magdas)*

241 A participant reported that, she goes to work and do other daily activities after she had recovered  
242 from the side effects of the cancer treatment.

243           *“I am a trader and do my own work, so I go to work when I have recovered from the*  
244           *therapy.” (Cynfo)*

245 Whilst other participants resume work as soon as they have recovered from the side effect of the  
246 treatment, one of the women lamented that she cannot go to work again.

247           *“Now, I can no longer perform my activities of daily living, I cannot work anymore.”*  
248           **(Doropo)**

249

## 250 Pain

251 Pain was commonly reported by majority of the study participants. Some of the women lamented  
252 that their pain resulted from the lump detected in the breast before diagnosis.

253           *“I felt some severe pains below my armpit without any associate weight gain/loss,*  
254           *discharges, ulcer or lump three days. I could not raise my hands up and that made me*  
255           *report to the hospital” (Magdas)*

256 *“I was in my usual state of health performing my normal daily routine activities until I*  
257 *started feeling pains in my right breast as a result of an acne under my right breast. I*  
258 *squeezed it out. Few days later I noticed a lump under that same breast without any*  
259 *discharge. It was painful than the previous one, so I reported to the hospital.” (Dorata)*

260 *“At the BCC I felt severe breast pains, a breast biopsy was done before I was referred to*  
261 *the oncology directorate” (Cynfo)*

262 For some of the study participants, side effects of chemo and radiotherapy were the major causes  
263 of pain experienced. Two of the respondents lamented that;

264 *“After every chemotherapy, all my joints start paining me which slows me down.”*  
265 **(Geortim)**

266 *“Aside breast pains, I always had head ache after I had received a chemotherapy. I also*  
267 *experienced pains in my joints but how severe it is do not match up to that of my breast*  
268 *pain and head.” (Doropo)*

269 For those who had surgery, the wounds were painful. A participant shared her experience.

270 *“The wound after my mastectomy was very painful. My chest area was swollen and I could*  
271 *not touch it. It was not easy...” (Marzu)*

272 After series of visit to the oncology directorate at KATH and therapies received, majority  
273 participants claimed that their pains had reduced drastically from severity to mild or no pain.

274 Others said that their pains had increased from mild to severe. One of the participants said;

275 *“My breast was very painful, tensed and the size had increased without any associated*  
276 *discharges or ulcer. I have been coming for a regular visit to this clinic for almost 3 years*  
277 *now, by the grace of God, I have no pain but sometimes I experienced the tenderness. Yes,*  
278 *it is on/off.” (Chrisu).*

## 279 Distorted Sleep

280 The participants reported they were unable to sleep continuously without any interruption  
281 emanating from the associated symptoms and treatment side effects. Almost all of the study  
282 participants said pain was the main cause of their inability to sleep well. Two of the participants  
283 narrated how pain and chemo therapy led them to sleepless times;

284 *“I could not sleep for about a month. My breast was painful. When I turn on my bed to a  
285 new position, I feel sharp pain in my breast which just wakes me up.” (Cynfo)*

286 *“As I said earlier, it is not easy being on the chemotherapy, you are always weak, you are  
287 unable sleep but always drowsy.” (Beakwa)*

288 One woman pointed out that, she could not sleep for about 3 months after the doctor diagnosed  
289 her of breast cancer. In her sleep, she often got frightened of the disease and woke up. Falling  
290 asleep again was difficult for this woman because she had to wait for some minutes.

291 *“On the day of hearing my diagnosis, I could not sleep the whole night. I will say I did a  
292 wake keeping, hmmm... because I felt asleep around 5:30 am. Afterwards, I just woke up  
293 at night frightened and panic over my diagnosis. Going back to bed was difficult for me. It  
294 continued for about three months until my third chemo therapy. ...I reported to the doctor  
295 and I was given some tablets to make me sleep.” (Chrisu)*

296

## 297 Fertility

298 Breast cancer and its treatment can affect the fertility of the survivor. Seven of the participants  
299 were in their reproductive age. All participants who were put on chemo therapy were informed by

300 the doctor that their chances of conception would lessen. So, they were advised to wait and  
301 complete the chemo therapies before they plan to conceive. One of the participants said;

302 *“Before I started the chemotherapy, I was told, “my chances of giving birth again will be*  
303 *50%” thus, you may complete the chemotherapy and may or may not be able to give birth*  
304 *or conceive again. ... I am hoping to give birth again because I have only one child, but I*  
305 *have been advised not to get pregnant whilst receiving the chemotherapy. (Flochi)*

306

## 307 Discussion

### 308 Demographic Characteristics of Breast Cancer Survivors

309 The age distribution of the 12 participants in this study ranged from 30 to 62 years. Ten (10) among  
310 the women were above 40 years, and two (2) of them were below 40 years. This gives an indication  
311 that breast cancer does rarely affect women under 40 years (CDC, 2019).

312 Three out of the twelve (12) participants had family history of breast cancer and other cancers.  
313 This agrees with past studies conducted which posited that 20% - 30% of newly diagnosed breast  
314 cancers are associated with history of cancer in first-degree and history of mammary gland diseases  
315 [19].

316 More so, all the study participants had formal education but completed at different levels. Only  
317 two had primary education. The rest of them (10) had secondary education with four (4) among  
318 them attained tertiary education. This could be attributed to the urban nature of the study setting  
319 tagged as the second most populous and largest city in Ghana. It could also be attributed to the  
320 assumption that educated people are more likely to avail themselves for breast screening. This is  
321 because lack of education can reduce access to opportunities and health resources [20, 21, 22].

322 Lastly, all the participants were gainfully employed before their diagnosis. This could be the reason  
323 why their BC were detected early since they were able to afford the initial health cost. This finding  
324 reiterates a study by Khater and friends who reported that Egyptian women with BC were  
325 diagnosed early because they could afford the initial breast cancer detection screening [23].

326

### 327 Physical Well-being of Breast Cancer Survivors

328 In this study, the physical well-being of breast cancer survivors was largely associated with the  
329 signs and symptoms of the disease and side effects of its treatment. Some of the study participants  
330 had moderate or poor experiences on their physical well-being components. In general, the  
331 findings from the current study revealed that the participants had poor physical well-being. This  
332 reiterates the findings of other studies related to poor physical well-being of BCSs [24, 25].  
333 Fatigue, pain, impaired functional ability and distorted sleep were the common experiences  
334 encountered among women with BC as per this study's findings.

335 Again, fatigue is a common symptom experienced by women living with BC [9]. This finding is  
336 consistent with the findings by Hofman and colleagues who reported that, 70% to 90% of breast  
337 cancer survivors reported about experiencing fatigue. This Breast cancer related fatigue (BCRF)  
338 may go a long way to interfere with the therapy and hence prolong the duration of the treatment  
339 [11]. The study findings revealed that, the participants were willing to carry on with their daily  
340 household chores and workplace duties but they could not perform any activity or perform without  
341 assistance because they easily get tired. This finding affirms a study by Bovbjerg and friends who  
342 posited that fatigue made BCSs unable or less able to perform their daily routine activities. In  
343 effect, the quality of life of breast cancer survivors were profoundly and pervasively affected by  
344 fatigue as already reported [28].



345 Pain associated with breast cancer has been investigated by various scholars around the world and  
346 reported accordingly [2]. This study findings showed that all the participants experienced pain as  
347 one of the main constituents of physical well-being. According to the study participants, the pain  
348 level ranged from mild to severe which was the same as the findings in other studies on BC pain  
349 [27, 30]. Majority of the study participants claimed that they reported to the hospital after  
350 experiencing pain in their breast which led to their diagnosis. This affirms the statement that BC  
351 itself often causes pain [31]. Four of the participants who had undergone mastectomy complained  
352 of the pain after the surgery and its effect on their livelihood. This finding was also consistent with  
353 a study conducted by Jadhav and Poovishnu Devi on post mastectomy syndrome [17]. Although  
354 the pain levels of the women were managed to a moderate level, it was difficult for the women to  
355 perform their daily activities without assistance. This finding was congruent with other studies  
356 which concluded that pain makes it difficult for BCSs to perform their daily activities and  
357 increased the impact on QoL [32].

358 Distorted sleep among the BCSs were found in this study. This is not surprising because a lot of  
359 studies had established distorted sleep among BCSs and cancer patients in general [33]. The sleep  
360 quality of the study participants was distorted as they went through different treatment procedures  
361 and pain. In other words, the women attributed the cause of their distorted sleep to pain and  
362 treatment of BC. This finding was in line with that of other studies [12,13]. Sleep disorders  
363 experienced by BCSs impacted negatively on their work productivity and medication abuse and  
364 misuse, thus affecting their quality of life [34]. In treating the distorted sleep, non-  
365 pharmacotherapy such as yoga and acupuncture were not popular, so the participants were put on  
366 pharmacotherapy like sleeping pills to enable them sleep well [33].

367 Breast cancer and its treatment can affect the fertility of the survivor. All participants who were  
368 receiving chemo therapy were informed by their doctor that their chances of conceiving would  
369 lessen and even if it becomes difficult to conceive, they will be assigned to a specialist to intervene.  
370 Seven of the participants who were in their reproductive age were not perturbed because they saw  
371 other BCSs who had given birth without breasts. The women were thought that they could give  
372 birth again after completing their treatment. The fertility of the study participants did not affect  
373 their QoL as reported by other studies that BC and its treatment can affect the fertility of the  
374 survivor. [14, 15].

375 The potential capacity of a BCS to perform her routine activities and tasks could be altered by BC  
376 and its treatment. This study's findings revealed that, all the participants were unable to perform  
377 their duties immediately after they have undergone their treatment. It was obvious from the  
378 findings that, the participants had to relax for seven (7) or more days to recover before they were  
379 able to perform their duties. Some of the BCS had to be assisted by friends and family members  
380 to perform their duties even when they had recovered. The participants attributed their inability or  
381 difficulty to perform their routine activities to side effects of the chemo therapy such as fatigue,  
382 pain, depression and body disfigurement which was not different from the results of existing  
383 studies [35, 36]. The functional ability of the study participants was poor especially after they have  
384 received a chemo therapy, hence impacting negatively on their QoL.

385

## 386 Conclusion

387 Fatigue, impaired functional ability, pain, distorted sleep and fertility were consistent with  
388 constructs of the Quality of life model. These physical symptoms negatively affected the total well-  
389 being of the BCSs.

## 390 Limitations of the study

391

392 The study selected only few participants to provide in-depth information in exploring the physical  
393 wellbeing of breast cancer survivors due to the qualitative approach employed which will make  
394 the findings difficult to generalise. Further research into the psychological wellbeing of BCSs is  
395 recommended.

396

397

398

399

400

401

402

403

404

405

406

407

408

409

## 410 Acknowledgement

411 “With Christ in the vessel I smile at the storm”, my first utmost gratitude goes to the almighty  
412 God, for the wisdom, protection and guidance during this work. My heartfelt appreciation goes to  
413 to my husband who believed in me and stood for me against all odds to further my education, may  
414 God continue to bless you. My appreciation goes to the head and staff of the Oncology Directorate  
415 of the Komfo Anokye Teaching Hospital for their support and cooperation during the recruitment  
416 stage. My deepest appreciation goes to all breast cancer survivors who availed themselves to  
417 participate in this work, without their cooperation this work would not have been successful. And  
418 to all my wonderful course mates, I am grateful and happy to have met you all, especially Gideon  
419 A. Atanuriba.

420

421

422

423

424

425

426

427

428

429

430

431

432

433

434

## 435   References

- 436       1. Bigatti, S. M., Wagner, C. D., Lydon-Lam, J. R., Steiner, J. L., & Miller, K. D. (2011).  
437       Depression in husbands of breast cancer patients: Relationships to coping and social  
438       support. *Supportive Care in Cancer*, *19*(4), 455–466. [https://doi.org/10.1007/s00520-010-](https://doi.org/10.1007/s00520-010-0835-8)  
439       0835-8
- 440       2. Calys-Tagoe, B. N. L., Senaedza, N. A. H., Arthur, C. A., & Clegg-Lamptey, J. N. (2017).  
441       Anxiety and depression among breast cancer patients in a tertiary hospital in  
442       Ghana. *Education (Highest completed)*, *19*, 12-5.
- 443       3. GLOBOCAN (IARC). (2018). Section of cancer information. Retrieved from  
444       <https://gco.iarc.fr/today/fact-sheets-populations>
- 445       4. Naku Ghartey Jnr, F., Anyanful, A., Eliason, S., Mohammed Adamu, S., & Debrah, S.  
446       (2016). Pattern of Breast Cancer Distribution in Ghana: A Survey to Enhance Early  
447       Detection, Diagnosis, and Treatment. *International Journal of Breast Cancer*, 2016.  
448       <https://doi.org/10.1155/2016/3645308>
- 449       5. Bemah, A. B., & Ncama, B. P. (2019). *Recognizing and appraising symptoms of breast*  
450       *cancer as a reason for delayed presentation in Ghanaian women: A qualitative study*. 1–  
451       22.
- 452       6. American Cancer Society, (2016). Understanding a Breast Cancer Diagnosis, Types of  
453       Breast Cancer. American Cancer Society. *Understanding a Breast Cancer Diagnosis*, 1–  
454       42. Retrieved from [https://www.cancer.org/cancer/breast-cancer/understanding-a-breast-](https://www.cancer.org/cancer/breast-cancer/understanding-a-breast-cancer-diagnosis/types-of-breast-cancer.html#references)  
455       cancer-diagnosis/types-of-breast-cancer.html#references
- 456       7. Capio, C. M., Sit, C. H., & Abernethy, B. (2014). Physical well-being. In *Encyclopedia of*  
457       *quality of life and well-being research* (pp. 4805-4807). Springer.

458

- 459 8. Rasmussen, D. M., Hansen, H. P., & Elverdam, B. (2010). How cancer survivors  
460 experience their changed body encountering others. *European Journal of Oncology*  
461 *Nursing*, 14(2), 154-159.
- 462 9. Pleun, J., de Klerk, C., Timman, R., Hinz, A., & van der Rijt, C. C. (2012). Differences in  
463 fatigue experiences among patients with advanced cancer, cancer survivors, and the general  
464 population. *Journal of pain and symptom management*, 44(6), 823-830.
- 465 10. Dodd, M. J., Cho, M. H., Cooper, B. A., & Miaskowski, C. (2010). The effect of symptom  
466 clusters on functional status and quality of life in women with breast cancer. *European*  
467 *Journal of Oncology Nursing*, 14(2), 101-110.
- 468 11. Savina, S., & Zaydiner, B. (2019). Cancer-Related Fatigue: Some Clinical Aspects. *Asia-*  
469 *Pacific journal of oncology nursing*, 6(1), 7–9. [https://doi.org/10.4103/apjon.apjon\\_45\\_18](https://doi.org/10.4103/apjon.apjon_45_18)
- 470 12. Chang, W. P., & Chang, Y. P. (2019). Meta-Analysis of Changes in Sleep Quality of  
471 Women with Breast Cancer before and after Therapy. *Breast Care*. S. Karger AG.  
472 <https://doi.org/10.1159/000502943>
- 473 13. Matthews, E. E., Tanner, J. M., & Dumont, N. A. (2016). Sleep disturbances in acutely ill  
474 patients with cancer. *Critical Care Nursing Clinics*, 28(2), 253-268.
- 475 14. Deshpande, N. A., Braun, I. M., & Meyer, F. L. (2015). Impact of fertility preservation  
476 counselling and treatment on psychological outcomes among women with cancer: a  
477 systematic review. *Cancer*, 121(22), 3938-3947.
- 478 15. Goncalves, V., & Quinn, G. P. (2016). Review of fertility preservation issues for young  
479 women with breast cancer. *Human Fertility*, 19(3), 152-165.

480

481

- 482 16. Dinas K.D. (2020) Fertility Counselling and Preservation for Breast Cancer Patients. In:  
483 Alipour S., Omranipour R. (eds) Diseases of the Breast during Pregnancy and Lactation.  
484 *Advances in Experimental Medicine and Biology*, vol 1252. Springer, Cham.
- 485 17. Jadhav, K. G., & Devi, T. P. (2020). Impact of Post Mastectomy Pain Syndrome on Health-  
486 Related Quality of Life in Modified Radical Mastectomy Patients. *Indian Journal of Public*  
487 *Health Research & Development*, 11(5), 172-176.
- 488 18. Rahi, S. (2017). Research Design and Methods: A Systematic Review of Research  
489 Paradigms, Sampling Issues and Instruments Development. Retrieved October 22, 2019,  
490 from International Journal of Economics & Management Sciences website:  
491 [https://www.researchgate.net/profile/Samar\\_Rahi/publication/316701205\\_Research\\_Desi](https://www.researchgate.net/profile/Samar_Rahi/publication/316701205_Research_Design_and_Methods_A_Systematic_Review_of_Research_Paradigms_Sampling_Issues_and_Instruments_Development/links/590dde424585159781859d9a/Research-Design-and-Methods-A-Systematic)  
492 [gn\\_and\\_Methods\\_A\\_Systematic\\_Review\\_of\\_Research\\_Paradigms\\_Sampling\\_Issues\\_an](https://www.researchgate.net/profile/Samar_Rahi/publication/316701205_Research_Design_and_Methods_A_Systematic_Review_of_Research_Paradigms_Sampling_Issues_and_Instruments_Development/links/590dde424585159781859d9a/Research-Design-and-Methods-A-Systematic)  
493 [d\\_Instruments\\_Development/links/590dde424585159781859d9a/Research-Design-and-](https://www.researchgate.net/profile/Samar_Rahi/publication/316701205_Research_Design_and_Methods_A_Systematic_Review_of_Research_Paradigms_Sampling_Issues_and_Instruments_Development/links/590dde424585159781859d9a/Research-Design-and-Methods-A-Systematic)  
494 [Methods-A-Systematic](https://www.researchgate.net/profile/Samar_Rahi/publication/316701205_Research_Design_and_Methods_A_Systematic_Review_of_Research_Paradigms_Sampling_Issues_and_Instruments_Development/links/590dde424585159781859d9a/Research-Design-and-Methods-A-Systematic).
- 495 19. Kamińska, M., Ciszewski, T., Łopacka-Szatan, K., Miotła, P., & Starosławska, E. (2015).  
496 Breast cancer risk factors. *Przegląd Menopauzalny*. Termedia Publishing House Ltd.  
497 <https://doi.org/10.5114/pm.2015.54346>
- 498 20. Street Jr, R. L., Makoul, G., Arora, N. K., & Epstein, R. M. (2009). How does  
499 communication heal? Pathways linking clinician–patient communication to health  
500 outcomes. *Patient education and counselling*, 74(3), 295-301.
- 501 21. Halbach, S. M., Ernstmann, N., Kowalski, C., Pfaff, H., Pfoertner, T. K., Wesselmann, S.,  
502 & Enders, A. (2016). Unmet information needs and limited health literacy in newly  
503 diagnosed breast cancer patients over the course of cancer treatment. *Patient education and*  
504 *counselling*, 99(9), 1511-1518.

- 505 22. Kugbey, N., Meyer-Weitz, A., & Asante, K. O. (2019). Access to health information,  
506 health literacy and health-related quality of life among women living with breast cancer:  
507 Depression and anxiety as mediators. *Patient education and counselling*, *102*(7), 1357-  
508 1363.
- 509 23. Khater, A. I., Noaman, M. K., Abdel Hafiz, M. N., Moneer, M. M., & Elattar, I. A. (2019).  
510 Health-Related Quality of Life among Egyptian Female Breast Cancer Patients at the  
511 National Cancer Institute, Cairo University. *Asian Pacific journal of cancer prevention*:  
512 *APJCP*, *20*(10), 3113–3119. <https://doi.org/10.31557/APJCP.2019.20.10.3113>
- 513 24. Okoli, C., Anyanwu, S. N. C., Ochomma, A. O., Emegoakor, C. D., Chianakwana, G. U.,  
514 Nzeako, H., & Ihekwoaba, E. (2019). Assessing the Quality of Life of Patients with Breast  
515 Cancer Treated in a Tertiary Hospital in a Resource-Poor Country. *World Journal of*  
516 *Surgery*, *43*(1), 44–51. <https://doi.org/10.1007/s00268-018-4772-x>
- 517 25. Purnama Sari, N. P. W. (2019). Physical Wellbeing in Cervical and Breast Cancer  
518 Survivors: A Cross-sectional Study in Surabaya, Indonesia. *Indonesian Journal of*  
519 *Cancer*, *12*(3), 80. <https://doi.org/10.33371/ijoc.v12i3.614>
- 520 26. Hofman, M., Ryan, J. L., Figueroa-Moseley, C. D., Jean-Pierre, P., & Morrow, G. R.  
521 (2007). Cancer-related fatigue: the scale of the problem. *Oncologist*, *12*(1), 4.
- 522 27. Bovbjerg, D. H., Keefe, F. J., Soo, M. S., Manculich, J., Van Denburg, A., Zuley, M. L.,  
523 & Shelby, R. A. (2019). Persistent breast pain in post-surgery breast cancer survivors and  
524 women with no history of breast surgery or cancer: associations with pain catastrophizing,  
525 perceived breast cancer risk, breast cancer worry, and emotional distress. *Acta Oncologica*,  
526 *58*(5), 763-768.
- 527



- 528 28. Hiensch, A. E., Bolam, K. A., Mijwel, S., May, A. M., & Wengström, Y. (2020). Sense of  
529 coherence and its relationship to participation, cancer-related fatigue, symptom burden,  
530 and quality of life in women with breast cancer participating in the OptiTrain exercise  
531 trial. *Supportive Care in Cancer*, 28(11), 5371–5379. [https://doi.org/10.1007/s00520-020-](https://doi.org/10.1007/s00520-020-05378-0)  
532 05378-0
- 533 29. American Cancer Society, (2019). Treatment and Support. Retrieved from  
534 <https://www.cancer.org/treatment/survivorship-during-and-after-treatment.html>
- 535 30. Chapman, E. J., Edwards, Z., Boland, J. W., Maddocks, M., Fettes, L., Malia, C., Bennett,  
536 M. I. (2020, April 1). Practice review: Evidence-based and effective management of pain  
537 in patients with advanced cancer. *Palliative Medicine*. SAGE Publications Ltd.  
538 <https://doi.org/10.1177/0269216319896955>
- 539 31. Rasmussen, G. H. F., Kristiansen, M., Arroyo-Morales, M., Voigt, M., & Madeleine, P.  
540 (2020). Absolute and relative reliability of pain sensitivity and functional outcomes of the  
541 affected shoulder among women with pain after breast cancer treatment. *PLoS ONE*, 15(6).  
542 <https://doi.org/10.1371/journal.pone.0234118>
- 543 32. Heary, K. O., Wong, A. W. K., Lau, S. C. L., Dengler, J., Thompson, M. R., Crock, L. W.,  
544 Novak, C. B., Philip, B. A., & Mackinnon, S. E. (2020). Quality of Life and Psychosocial  
545 Factors as Predictors of Pain Relief Following Nerve Surgery. *HAND*.  
546 <https://doi.org/10.1177/1558944720911213>
- 547 33. Otte, J. L., Carpenter, J. S., Manchanda, S., Rand, K. L., Skaar, T. C., Weaver, M., Landis,  
548 C. (2015, February 1). Systematic review of sleep disorders in cancer patients: Can the  
549 prevalence of sleep disorders be ascertained? *Cancer Medicine*. Blackwell Publishing Ltd.  
550 <https://doi.org/10.1002/cam4.356>

- 551 34. Siefert, M. L., F. Hong, B. Valcarce, & D. L. Berry, (2013). Patient and clinician  
552 communication of self-reported insomnia during ambulatory cancer care clinic visits.  
553 *Cancer Nurs.* 37:E51–E59.
- 554 35. Modena, C. M., Martins, A. M., Ribeiro, R. B. N., & Almeida, S. S. L. d. (2014). Men and  
555 the process of illness by cancer: a look at the Brazilian scientific production. *Revista Baiana*  
556 *de Saúde Pública*, 37(3), 644-660. Retrieved from [http://files.bvs.br/upload/S/0100-](http://files.bvs.br/upload/S/0100-0233/2013/v37n3/a4466.pdf)  
557 [0233/2013/v37n3/a4466.pdf](http://files.bvs.br/upload/S/0100-0233/2013/v37n3/a4466.pdf).
- 558 36. The American Society of Clinical Oncology (2020). Breast Cancers. Retrieved from:  
559 <https://beta.asco.org>.
